# Supplementary material for: CSF1R methylation is a key regulatory mechanism of tumor-associated macrophages in hepatocellular carcinoma
Source: PubMed Central journal article supplement (PMC7377184; doi:10.3892/ol.2020.11726), 2020-06-11
Supplement: Supplementary_Data.pdf [file Supplementary_Data.pdf]

Figure S1. Correlation between CSF1R methylation and expression in combined hepatocellular carcinoma and adjacent non-cancerous tissue samples. (A) cg12862231, (B) cg1649221, (C) cg07260017 and (D) cg01875467. CSF1R, colony stimulating factor 1 receptor.

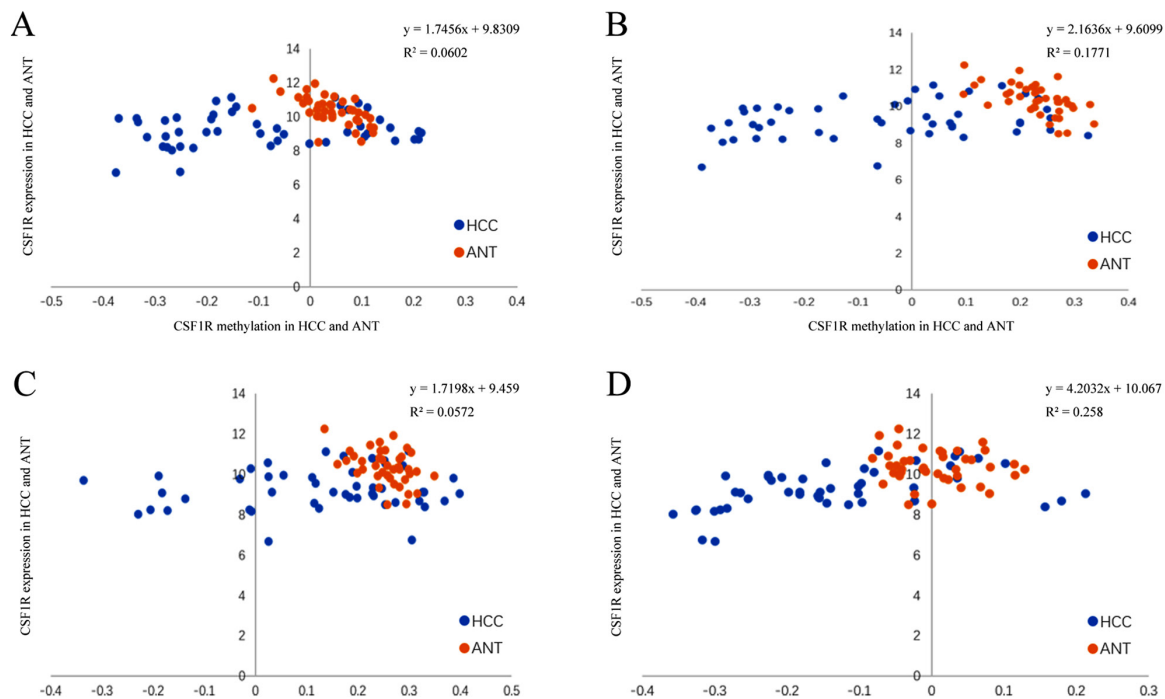

Table SI. Specific locations of each locus shown in Fig. 1.

| Locus                    | Location        |
|--------------------------|-----------------|
| Transcription start site | chr5: 149492935 |
| CpG1                     | chr5: 149492911 |
| CpG2                     | chr5: 149492902 |
| CpG3                     | chr5: 149492846 |
| CpG4                     | chr5: 149492835 |
| CpG5                     | chr5: 149492801 |
| CpG6                     | chr5: 149492742 |
| CpG7                     | chr5: 149492714 |
| CpG8                     | chr5: 149492690 |
| CpG9                     | chr5: 149492669 |
| cg01875467               | chr5: 149493008 |
| cg07260017               | chr5: 149492480 |

cg01875467 and cg07260017 represent the probe IDs in the Illumina Infinium HumanMethylation 450 array. chr, chromosome.

Table SII. Methylation correlation in 7 CpG sites of colony stimulating factor 1 receptor in tumor tissues.

|         |       | R       |                     |                     |                     |                     |                     |                     |
|---------|-------|---------|---------------------|---------------------|---------------------|---------------------|---------------------|---------------------|
|         |       | TCpG2   | TCpG3               | TCpG4               | TCpG5               | TCpG6               | TCpG8               | TCpG9               |
| P-value | TCpG2 | N/A     | 0.5621 <sup>a</sup> | 0.5203 <sup>a</sup> | 0.5916 <sup>a</sup> | 0.5621 <sup>a</sup> | 0.4535 <sup>a</sup> | 0.5100 <sup>a</sup> |
|         | TCpG3 | <0.0001 | N/A                 | 0.6704 <sup>a</sup> | 0.7501 <sup>a</sup> | 1.0000 <sup>a</sup> | 0.6270 <sup>a</sup> | 0.5589 <sup>a</sup> |
|         | TCpG4 | <0.0001 | <0.0001             | N/A                 | 0.7637 <sup>a</sup> | 0.6704 <sup>a</sup> | 0.5424 <sup>a</sup> | 0.6483 <sup>a</sup> |
|         | TCpG5 | <0.0001 | <0.0001             | <0.0001             | N/A                 | 0.7501 <sup>a</sup> | 0.4273 <sup>a</sup> | 0.5544 <sup>a</sup> |
|         | TCpG6 | <0.0001 | <0.0001             | <0.0001             | <0.0001             | N/A                 | 0.6270 <sup>a</sup> | 0.5589 <sup>a</sup> |
|         | TCpG8 | <0.0001 | <0.0001             | <0.0001             | <0.0001             | <0.0001             | N/A                 | 0.8148 <sup>a</sup> |
|         | TCpG9 | <0.0001 | <0.0001             | <0.0001             | <0.0001             | <0.0001             | <0.0001             | N/A                 |

<sup>a</sup>P<0.01. TCpG, tumor CpG sites; N/A, not applicable.

Table SIII. Methylation correlation of 7 CpG sites of colony stimulating factor 1 receptor and adjacent non-cancerous tissues.

|         |       | R       |         |                     |                     |                     |                     |                     |
|---------|-------|---------|---------|---------------------|---------------------|---------------------|---------------------|---------------------|
|         |       | NCpG2   | NCpG3   | NCpG4               | NCpG5               | NCpG6               | NCpG8               | NCpG9               |
| P-value | NCpG2 | N/A     | 0.1791  | 0.4138 <sup>b</sup> | 0.2079 <sup>a</sup> | 0.1791              | 0.3739 <sup>b</sup> | 0.3680 <sup>b</sup> |
|         | NCpG3 | 0.0533  | N/A     | 0.4032 <sup>b</sup> | 0.3629 <sup>b</sup> | 1.0000 <sup>b</sup> | 0.2924 <sup>b</sup> | 0.3476 <sup>b</sup> |
|         | NCpG4 | <0.0001 | <0.0001 | N/A                 | 0.6300 <sup>b</sup> | 0.4032 <sup>b</sup> | 0.0917              | 0.3076 <sup>b</sup> |
|         | NCpG5 | 0.0245  | <0.0001 | <0.0001             | N/A                 | 0.3629 <sup>b</sup> | 0.0414              | 0.4232 <sup>b</sup> |
|         | NCpG6 | 0.0533  | <0.0001 | <0.0001             | <0.0001             | N/A                 | 0.2924 <sup>b</sup> | 0.3476 <sup>b</sup> |
|         | NCpG8 | <0.0001 | 0.0003  | 0.2662              | 0.6162              | 0.0003              | N/A                 | 0.5829 <sup>b</sup> |
|         | NCpG9 | <0.0001 | <0.0001 | 0.0001              | <0.0001             | <0.0001             | <0.0001             | N/A                 |

<sup>a</sup>P<0.05; <sup>b</sup>P<0.01. NCpG, non-cancerous CpG sites; N/A, not applicable.
